# Supplementary material for: Integrative deep models for alternative splicing
Source: PubMed Central journal article supplement — Bioinformatics. 2017 Jul 12;33(14):i274–82. doi: 10.1093/bioinformatics/btx268 (PMC5870723; doi:10.1093/bioinformatics/btx268), 2017-07-12

# Supplementary Information for Integrative Deep Models for Alternative Splicing

Anupama Jha<sup>1</sup>, Matthew R Gazzara<sup>1,2,3</sup> and Yoseph Barash<sup>1,2,\*</sup>

<sup>1</sup>Department of Computer and Information Science,  
School of Engineering and Applied Sciences, and

<sup>2</sup>Department of Genetics, and

<sup>3</sup>Department of Biochemistry and Biophysics,  
Perelman School of Medicine,  
University of Pennsylvania,  
Philadelphia, PA, 19104 USA

**Supplementary Table 1:** Number of changing versus total events in the five tissue data used in Leung's DNN.

| Events/Tissue                              | Brain | Heart | Kidney | Liver | Testis |
|--------------------------------------------|-------|-------|--------|-------|--------|
| Total                                      | 6570  | 5926  | 6534   | 5384  | 4716   |
| Changing<br>( $\Delta\text{PSII} > 0.15$ ) | 1566  | 1224  | 1243   | 975   | 1039   |

**Supplementary Table 2:** Number of changing versus total events in the dataset 2, MGP without cassetization.

| Events/Tissue                              | Heart | Hippocampus | Liver | Lung | Spleen | Thymus |
|--------------------------------------------|-------|-------------|-------|------|--------|--------|
| Total                                      | 5343  | 5458        | 3898  | 5395 | 5217   | 6324   |
| Changing<br>( $\Delta\text{PSII} > 0.15$ ) | 950   | 1120        | 614   | 876  | 721    | 1063   |

**Supplementary Table 3:** Number of changing versus total events in the dataset 3, MGP with cassetization.

| Events/Tissue                              | Heart | Hippocampus | Liver | Lung | Spleen | Thymus |
|--------------------------------------------|-------|-------------|-------|------|--------|--------|
| Total                                      | 8026  | 8178        | 5941  | 8234 | 7879   | 9490   |
| Changing<br>( $\Delta\text{PSII} > 0.15$ ) | 1494  | 1752        | 948   | 1381 | 1145   | 1690   |

**Supplementary Table 4:** AUCs for inclusion vs. all, exclusion vs. all and change vs. no change for BNN-MLR and BNN-UDC

| Tissue        | Model   | Inclusion                        | Exclusion                        | No Change                        |
|---------------|---------|----------------------------------|----------------------------------|----------------------------------|
| Brain-Heart   | BNN-MLR | 76.54 $\pm$ 0.05                 | 86.28 $\pm$ 0.26                 | 82.38 $\pm$ 0.11                 |
|               | BNN-UDC | <b>78.83<math>\pm</math>0.06</b> | <b>87.52<math>\pm</math>0.09</b> | <b>85.45<math>\pm</math>0.03</b> |
| Brain-Kidney  | BNN-MLR | 71.56 $\pm$ 0.27                 | 87.92 $\pm$ 0.14                 | 80.64 $\pm$ 0.27                 |
|               | BNN-UDC | <b>74.62<math>\pm</math>0.16</b> | <b>89.66<math>\pm</math>0.07</b> | <b>84.57<math>\pm</math>0.05</b> |
| Brain-Liver   | BNN-MLR | 70.23 $\pm$ 0.45                 | 88.98 $\pm$ 0.18                 | 79.44 $\pm$ 0.43                 |
|               | BNN-UDC | <b>72.29<math>\pm</math>0.06</b> | <b>90.93<math>\pm</math>0.03</b> | <b>83.12<math>\pm</math>0.11</b> |
| Brain-Testis  | BNN-MLR | 71.31 $\pm$ 0.26                 | 83.58 $\pm$ 0.02                 | 76.98 $\pm$ 0.07                 |
|               | BNN-UDC | <b>74.91<math>\pm</math>0.23</b> | <b>85.11<math>\pm</math>0.10</b> | <b>81.09<math>\pm</math>0.10</b> |
| Heart-Kidney  | BNN-MLR | <b>76.17<math>\pm</math>0.31</b> | 88.71 $\pm$ 0.36                 | 84.23 $\pm$ 0.20                 |
|               | BNN-UDC | <b>76.17<math>\pm</math>0.51</b> | <b>90.90<math>\pm</math>0.05</b> | <b>86.59<math>\pm</math>0.12</b> |
| Heart-Liver   | BNN-MLR | <b>71.42<math>\pm</math>0.50</b> | 86.80 $\pm$ 0.21                 | 79.61 $\pm$ 0.30                 |
|               | BNN-UDC | <b>71.35<math>\pm</math>0.25</b> | <b>88.11<math>\pm</math>0.05</b> | <b>81.94<math>\pm</math>0.05</b> |
| Heart-Testis  | BNN-MLR | 76.07 $\pm$ 0.54                 | 81.78 $\pm$ 0.17                 | 77.13 $\pm$ 0.38                 |
|               | BNN-UDC | <b>77.06<math>\pm</math>0.39</b> | <b>83.59<math>\pm</math>0.12</b> | <b>81.42<math>\pm</math>0.09</b> |
| Kidney-Liver  | BNN-MLR | 72.07 $\pm$ 0.63                 | 75.68 $\pm$ 1.24                 | 72.40 $\pm$ 0.68                 |
|               | BNN-UDC | <b>73.58<math>\pm</math>1.29</b> | <b>76.60<math>\pm</math>1.41</b> | <b>74.68<math>\pm</math>0.86</b> |
| Kidney-Testis | BNN-MLR | 76.72 $\pm$ 0.43                 | <b>72.98<math>\pm</math>0.29</b> | 72.28 $\pm$ 0.15                 |
|               | BNN-UDC | <b>78.05<math>\pm</math>0.19</b> | <b>72.83<math>\pm</math>0.44</b> | <b>77.38<math>\pm</math>0.27</b> |
| Liver-Testis  | BNN-MLR | 77.11 $\pm$ 0.27                 | <b>74.49<math>\pm</math>0.63</b> | 73.52 $\pm$ 0.49                 |
|               | BNN-UDC | <b>78.36<math>\pm</math>0.44</b> | <b>74.66<math>\pm</math>0.44</b> | <b>78.32<math>\pm</math>0.33</b> |

**Supplementary Table 5:** Variance explained in PSI ( $R^2$ ) for BNN-MLR and BNN-UDC.

| Tissue | Model   | Variance Explained |
|--------|---------|--------------------|
| Brain  | BNN-MLR | 21.14+-0.06        |
|        | BNN-UDC | 21.30+-0.06        |
| Heart  | BNN-MLR | 22.84+-0.09        |
|        | BNN-UDC | 22.90+-0.07        |
| Kidney | BNN-MLR | 23.75+-0.18        |
|        | BNN-UDC | 24.30+-0.09        |
| Liver  | BNN-MLR | 21.54+-0.10        |
|        | BNN-UDC | 21.70+-0.05        |
| Testis | BNN-MLR | 21.62+-0.03        |
|        | BNN-UDC | 22.21+-0.13        |

**Supplementary Table 6:** AUCs for inclusion vs. all, exclusion vs. all and change vs. no change for BNN-UDC, DNN-LMH and DNN-PSI.

| Tissue        | Model   | Inclusion          | Exclusion          | No Change          |
|---------------|---------|--------------------|--------------------|--------------------|
| Brain-heart   | BNN-UDC | 78.83+0.06         | 87.52+-0.09        | <b>85.45+-0.03</b> |
|               | DNN-LMH | 82.08+-0.36        | 84.75+-0.43        | 85.01+-0.24        |
|               | DNN-PSI | <b>82.98+-0.13</b> | <b>86.66+-0.39</b> | <b>85.33+-0.23</b> |
| Brain-Kidney  | BNN-UDC | 74.62+-0.16        | 89.66+-0.07        | 84.57+-0.05        |
|               | DNN-LMH | <b>82.14+-0.22</b> | 88.99+-0.10        | 86.54+-0.08        |
|               | DNN-PSI | <b>82.82+-0.41</b> | <b>90.36+-0.03</b> | <b>87.23+-0.06</b> |
| Brain-Liver   | BNN-UDC | 72.29+-0.06        | 90.93+-0.03        | 83.12+-0.11        |
|               | DNN-LMH | 82.33+-0.45        | 91.03+-0.60        | 86.98+-0.21        |
|               | DNN-PSI | <b>84.31+-0.39</b> | <b>93.29+-0.07</b> | <b>87.49+-0.26</b> |
| Brain-Testis  | BNN-UDC | 74.91+-0.23        | 85.11+-0.10        | 81.09+-0.10        |
|               | DNN-LMH | 78.03+-0.27        | 85.23+-0.32        | <b>82.99+-0.02</b> |
|               | DNN-PSI | <b>80.92+-0.71</b> | <b>87.44+-0.22</b> | <b>82.78+-0.48</b> |
| Heart-Kidney  | BNN-UDC | 76.17+-0.51        | 90.90+-0.05        | <b>86.59+-0.12</b> |
|               | DNN-LMH | 79.31+-0.35        | 86.40+-0.52        | 84.36+-0.32        |
|               | DNN-PSI | <b>81.96+-0.35</b> | <b>91.72+-0.38</b> | <b>86.98+-0.34</b> |
| Heart-Liver   | BNN-UDC | 71.35+-0.25        | 88.11+-0.05        | 81.94+-0.05        |
|               | DNN-LMH | 76.86+-1.24        | 86.93+-0.67        | 83.13+-0.49        |
|               | DNN-PSI | <b>80.64+-1.18</b> | <b>91.41+-0.29</b> | <b>85.58+-0.59</b> |
| Heart-Testis  | BNN-UDC | 77.06+-0.39        | 83.59+-0.12        | 81.42+-0.09        |
|               | DNN-LMH | 82.87+-0.37        | 84.11+-0.86        | 84.56+-0.21        |
|               | DNN-PSI | <b>85.25+-0.63</b> | <b>90.57+-0.45</b> | <b>86.67+-0.63</b> |
| Kidney-Liver  | BNN-UDC | 73.58+-1.29        | 76.60+-1.41        | 74.68+-0.86        |
|               | DNN-LMH | 81.02+-2.97        | 69.31+-6.92        | 78.84+-0.22        |
|               | DNN-PSI | <b>90.19+-0.71</b> | <b>87.87+-0.20</b> | <b>91.13+-0.26</b> |
| Kidney-Testis | BNN-UDC | 78.05+-0.19        | 72.83+-0.44        | 77.38+-0.27        |
|               | DNN-LMH | 85.92+-1.19        | 83.99+-0.79        | 86.00+-0.34        |
|               | DNN-PSI | <b>89.24+-0.42</b> | <b>89.21+-0.31</b> | <b>88.37+-0.25</b> |
| Liver-Testis  | BNN-UDC | 78.36+-0.44        | 74.66+-0.44        | 78.32+-0.33        |
|               | DNN-LMH | 90.81+-0.69        | 91.56+-0.33        | 91.27+-0.14        |
|               | DNN-PSI | <b>93.69+-0.38</b> | <b>92.70+-0.54</b> | <b>91.90+-0.72</b> |

**Supplementary Table 7:** AUCs for inclusion vs. all, exclusion vs. all and change vs. no change for BNN-UDC without and with cassetization (BNN-CAS).

| Tissue        | Model   | Inclusion         | Exclusion         | No Change         |
|---------------|---------|-------------------|-------------------|-------------------|
| Heart-Hipp    | BNN-UDC | 93.00+0.12        | 83.80+0.15        | 91.03+0.04        |
|               | BNN-CAS | <b>93.73+0.23</b> | <b>86.60+0.46</b> | <b>91.76+0.18</b> |
| Heart_Liver   | BNN-UDC | 74.51+0.53        | 84.02+0.24        | 80.69+0.07        |
|               | BNN-CAS | <b>75.85+0.46</b> | <b>87.32+0.13</b> | <b>82.77+0.35</b> |
| Heart-Lung    | BNN-UDC | 79.58+0.15        | 84.14+0.37        | 83.18+0.25        |
|               | BNN-CAS | <b>83.22+0.68</b> | <b>86.52+0.16</b> | <b>85.81+0.25</b> |
| Heart-Spleen  | BNN-UDC | 77.16+0.71        | 88.10+0.14        | 85.22+0.09        |
|               | BNN-CAS | <b>79.74+0.34</b> | <b>89.44+0.47</b> | <b>86.56+0.38</b> |
| Heart-Thymus  | BNN-UDC | 75.92+1.02        | 83.13+0.28        | 82.54+0.10        |
|               | BNN-CAS | <b>79.66+0.42</b> | <b>84.11+0.18</b> | <b>83.96+0.17</b> |
| Hipp-Liver    | BNN-UDC | 82.07+0.35        | 91.34+0.23        | 89.09+0.25        |
|               | BNN-CAS | <b>83.62+0.21</b> | <b>92.85+0.12</b> | <b>89.84+0.09</b> |
| Hipp-Lung     | BNN-UDC | 81.14+0.23        | 91.05+0.06        | 89.39+0.04        |
|               | BNN-CAS | <b>83.53+0.32</b> | <b>91.97+0.12</b> | <b>90.13+0.15</b> |
| Hipp-Spleen   | BNN-UDC | 81.79+0.11        | 91.74+0.12        | 89.62+0.04        |
|               | BNN-CAS | <b>83.92+0.27</b> | <b>93.25+0.06</b> | <b>90.69+0.05</b> |
| Hipp-Thymus   | BNN-UDC | 78.67+0.38        | 87.27+0.04        | 86.19+0.14        |
|               | BNN-CAS | <b>80.86+0.28</b> | <b>88.56+0.29</b> | <b>87.00+0.20</b> |
| Liver-Lung    | BNN-UDC | 78.23+1.13        | 80.24+0.79        | 79.65+0.89        |
|               | BNN-CAS | <b>81.97+0.63</b> | <b>83.53+0.62</b> | <b>83.11+0.29</b> |
| Liver-Spleen  | BNN-UDC | 83.69+0.24        | 86.41+0.46        | 86.13+0.26        |
|               | BNN-CAS | <b>81.27+1.49</b> | <b>85.07+0.65</b> | <b>84.71+0.46</b> |
| Liver-Thymus  | BNN-UDC | 82.60+0.48        | 72.43+0.89        | 74.78+0.48        |
|               | BNN-CAS | <b>85.98+1.02</b> | <b>75.66+0.98</b> | <b>77.80+0.99</b> |
| Lung-Spleen   | BNN-UDC | 74.36+0.86        | 79.62+0.29        | 76.85+0.60        |
|               | BNN-CAS | <b>75.34+0.91</b> | <b>82.15+0.47</b> | <b>78.44+0.77</b> |
| Lung-Thymus   | BNN-UDC | 78.69+0.30        | 73.65+0.61        | 76.07+0.57        |
|               | BNN-CAS | <b>81.08+0.35</b> | <b>75.08+1.13</b> | <b>77.43+0.64</b> |
| Spleen-Thymus | BNN-UDC | 73.27+1.53        | 69.79+1.40        | 70.44+1.62        |
|               | BNN-CAS | <b>76.58+2.54</b> | <b>72.42+1.65</b> | <b>72.79+1.36</b> |

**Supplementary Table 8:** AUCs for low vs. all, medium vs. all and high vs. all for BNN-CAS and BNN-CAS with CLIP data (BNN-CAS-CLIP)

| Tissue | Model        | Low                | Medium             | High               |
|--------|--------------|--------------------|--------------------|--------------------|
| Heart  | BNN-CAS      | 87.38+-0.07        | 82.45+-0.16        | 87.29+-0.07        |
|        | BNN-CAS-CLIP | <b>88.00+-0.10</b> | <b>83.59+-0.21</b> | <b>87.94+-0.14</b> |
| Hipp   | BNN-CAS      | 86.56+-0.02        | 84.27+-0.16        | 86.94+-0.06        |
|        | BNN-CAS-CLIP | <b>87.36+-0.09</b> | <b>84.81+-0.13</b> | <b>87.71+-0.07</b> |
| Liver  | BNN-CAS      | 89.10+-0.10        | <b>84.02+-0.15</b> | 89.54+-0.10        |
|        | BNN-CAS-CLIP | <b>89.46+-0.10</b> | 83.75+-0.26        | <b>89.92+-0.14</b> |
| Lung   | BNN-CAS      | 89.48+-0.04        | 81.07+-0.22        | 89.64+-0.05        |
|        | BNN-CAS-CLIP | <b>90.00+-0.08</b> | <b>81.54+-0.29</b> | <b>90.13+-0.04</b> |
| Spleen | BNN-CAS      | 89.41+-0.07        | 83.73+-0.05        | 89.71+-0.05        |
|        | BNN-CAS-CLIP | <b>89.71+-0.07</b> | 82.89+-0.15        | <b>89.94+-0.05</b> |
| Thymus | BNN-CAS      | 89.76+-0.09        | 80.56+-0.11        | 89.99+-0.08        |
|        | BNN-CAS-CLIP | <b>90.19+-0.05</b> | <b>80.74+-0.20</b> | <b>90.28+-0.04</b> |

**Supplementary Table 9:** AUCs for inclusion vs. all, exclusion vs. all and change vs. no change for BNN-CAS and BNN-CAS with CLIP data (BNN-CAS-CLIP)

| Tissue        | Model        | Inclusion  | Exclusion  | No Change  |
|---------------|--------------|------------|------------|------------|
| Heart-Hipp    | Model        | Up         | Down       | No Change  |
|               | BNN-CAS      | 92.88±0.14 | 88.34±0.18 | 92.20±0.06 |
| Heart_Liver   | BNN-CAS-CLIP | 92.97±0.12 | 88.22±0.16 | 92.26±0.06 |
|               | BNN-CAS      | 76.93±0.48 | 89.42±0.15 | 84.70±0.23 |
| Heart-Lung    | BNN-CAS-CLIP | 78.09±0.49 | 89.38±0.24 | 85.13±0.15 |
|               | BNN-CAS      | 81.81±0.62 | 89.28±0.13 | 87.44±0.17 |
| Heart-Spleen  | BNN-CAS-CLIP | 82.52±0.67 | 89.77±0.18 | 87.94±0.18 |
|               | BNN-CAS      | 78.93±0.56 | 90.53±0.14 | 87.09±0.20 |
| Heart-Thymus  | BNN-CAS-CLIP | 79.37±0.21 | 91.03±0.13 | 87.45±0.08 |
|               | BNN-CAS      | 80.29±0.37 | 85.36±0.09 | 85.01±0.04 |
| Hipp-Liver    | BNN-CAS-CLIP | 82.01±0.64 | 86.20±0.24 | 85.91±0.23 |
|               | BNN-CAS      | 82.56±0.20 | 93.14±0.08 | 89.90±0.12 |
| Hipp-Lung     | BNN-CAS-CLIP | 83.33±0.08 | 93.16±0.02 | 90.32±0.07 |
|               | BNN-CAS      | 83.63±0.21 | 92.60±0.03 | 90.58±0.03 |
| Hipp-Spleen   | BNN-CAS-CLIP | 84.19±0.23 | 92.71±0.05 | 90.61±0.04 |
|               | BNN-CAS      | 82.70±0.24 | 93.32±0.03 | 90.51±0.10 |
| Hipp-Thymus   | BNN-CAS-CLIP | 83.84±0.34 | 93.36±0.06 | 90.75±0.10 |
|               | BNN-CAS      | 82.42±0.21 | 88.29±0.09 | 87.47±0.05 |
| Liver-Lung    | BNN-CAS-CLIP | 83.10±0.36 | 88.63±0.15 | 87.83±0.18 |
|               | BNN-CAS      | 84.02±0.63 | 80.35±0.67 | 82.16±0.54 |
| Liver-Spleen  | BNN-CAS-CLIP | 84.60±0.36 | 81.73±0.37 | 83.07±0.42 |
|               | BNN-CAS      | 85.13±0.94 | 87.29±0.08 | 87.28±0.21 |
| Liver-Thymus  | BNN-CAS-CLIP | 85.41±0.40 | 87.66±0.15 | 87.59±0.21 |
|               | BNN-CAS      | 84.06±0.80 | 76.22±0.47 | 78.45±0.48 |
| Lung-Spleen   | BNN-CAS-CLIP | 84.25±1.10 | 74.23±0.03 | 77.03±0.14 |
|               | BNN-CAS      | 80.08±0.90 | 81.15±0.11 | 81.06±0.52 |
| Lung-Thymus   | BNN-CAS-CLIP | 79.82±0.32 | 80.71±0.49 | 80.71±0.09 |
|               | BNN-CAS      | 80.07±0.46 | 77.64±0.58 | 78.73±0.38 |
| Spleen-Thymus | BNN-CAS-CLIP | 79.97±0.41 | 78.41±0.44 | 79.57±0.30 |
|               | BNN-CAS      | 73.98±1.64 | 71.64±0.95 | 72.06±0.78 |

**Supplementary Table 10:** CLIP-Seq experiments used to derive CLIP features

| RBP    | Condition            | Run accession numbers     | Dataset accession number | PMID     |
|--------|----------------------|---------------------------|--------------------------|----------|
| Celf1  | C2C12                | SRR1593050-<br>SRR1593052 | GSE61893                 | 25883322 |
| Celf1  | C2C12                | ERR039244-<br>ERR039249   | E-MTAB-<br>414           | 22355723 |
| Celf1  | heart                | SRR1593053-<br>SRR1593054 | GSE61893                 | 25883322 |
| Celf1  | muscle               | SRR1593055-<br>SRR1593056 | GSE61893                 | 25883322 |
| Celf2  | N2A<br>nueroblastoma | SRR3179956                | GSE78111                 | 27253061 |
| Mbnl1  | brain                | SRR533660,SRR533661       | GSE39911                 | 22901804 |
| Mbnl1  | C2C12                | SRR533665                 | GSE39911                 | 22901804 |
| Mbnl1  | C2C12                | ERR039250-<br>ERR039254   | E-MTAB-<br>414           | 22355723 |
| Mbnl1  | heart                | SRR533662                 | GSE39911                 | 22901804 |
| Mbnl1  | muscle               | SRR1553158-<br>SRR1553160 | GSE60487                 | 25263597 |
| Mbnl1  | muscle               | SRR533663                 | GSE39911                 | 22901804 |
| Ptbp1  | C2C12                | ERR039255-<br>ERR039256   | E-MTAB-<br>414           | 22355723 |
| Rbfox1 | brain                | SRR1035719                | SRP030031                | 24213538 |
| Rbfox2 | brain                | SRR1035720                | SRP030031                | 24213538 |
| Rbfox2 | cardiomyocytes       | SRR1297227-<br>SRR1297228 | GSE57926                 | 25753418 |



**Supplementary Table 11:** RNA-Seq data for Splice Factor Knockout/Knockdown/Overexpression experiments

| RNA-Seq Experiment                        | Dataset Accession | PMID     |
|-------------------------------------------|-------------------|----------|
| CELF1 OE heart                            | GSE56185          | 24752171 |
| CELF2 OE heart                            | GSE61893          | 25883322 |
| CELF1 OE muscle                           | GSE61893          | 25883322 |
| Rbfox2 KD myotubes (differentiated C2C12) | GSE58928          | 25087874 |
| Mbnl1 KO heart                            | GSE39911          | 22901804 |
| Mbnl1 KO brain                            | GSE39911          | 22901804 |
| Mbnl1 KO muscle                           | GSE39911          | 22901804 |

**Supplementary Table 12:** Hyperparameters were tuned for DNN-LMH and DNN-PSI using the Spearmint package similar to Leung et al, 2014

| Hyperparameter             | Initial Range | Final Range |
|----------------------------|---------------|-------------|
| Learning Rate LMH Code     | 0.001-0.02    | 0.001-0.003 |
| Learning Rate DNI Code     | 0.01-0.05     | 0.02-0.045  |
| Learning Rate Autoencoder  | 0.001-0.02    | 0.001-0.005 |
| Standard deviation weights | 0.01-0.05     | 0.01-0.03   |
| Minibatch Size             | 1200-2000     | 1200-1400   |
| Hidden Layer 1             | 300-800       | 500-650     |
| Hidden Layer 2             | 3000-8000     | 6000-7000   |
| Hidden Layer 3             | 450-800       | 500-700     |

**Supplementary Figure 1: Title of each panel shows the splice factor KO/KD/OE in the tissue of interest. Left figure of each panel shows the correlation between RNA-Seq KD/KO/OE dPSI (x-axis) and the model predicted KD/KO/OE dPSI (y-axis). Right figure of each panel shows the correlation between RNA-Seq KD/KO/OE dPSI (x-axis) and the in silico KD dPSI (y-axis).**

**Mbn1 muscle Knockout**

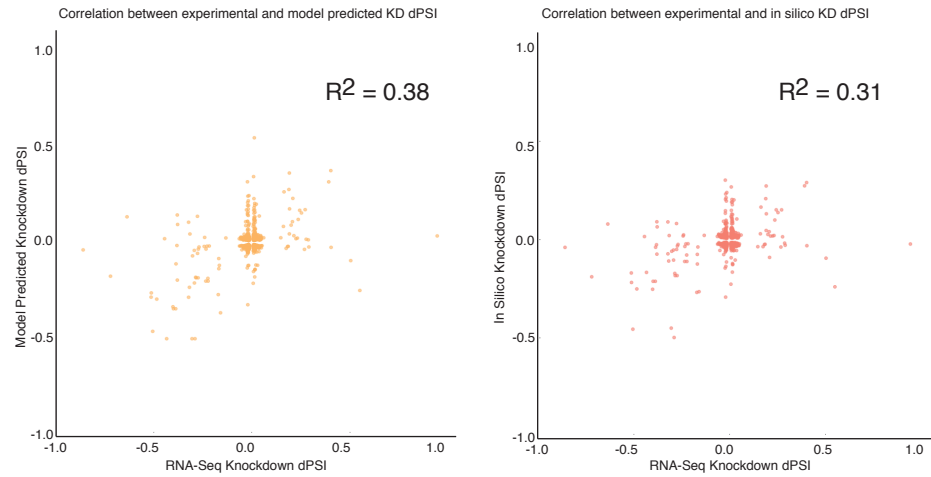

**Rbfox2 Knockdown (KD) in C2C12 Cells**

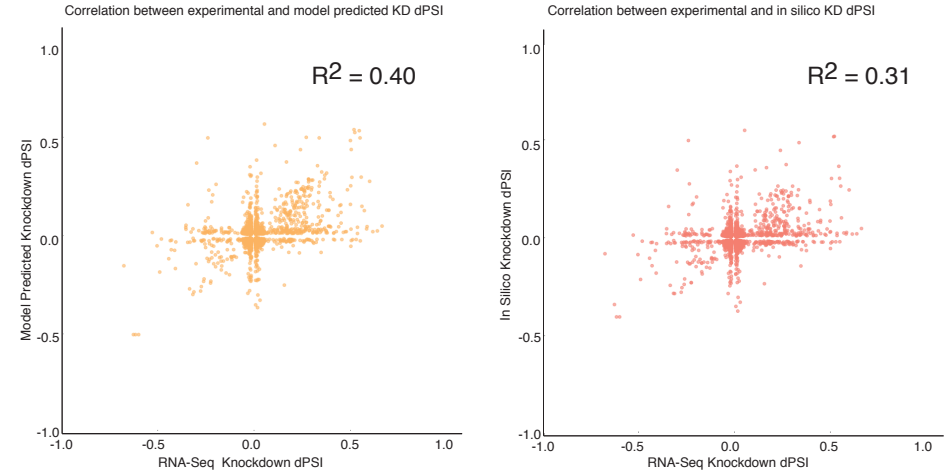

**Celf2 heart Overexpression**

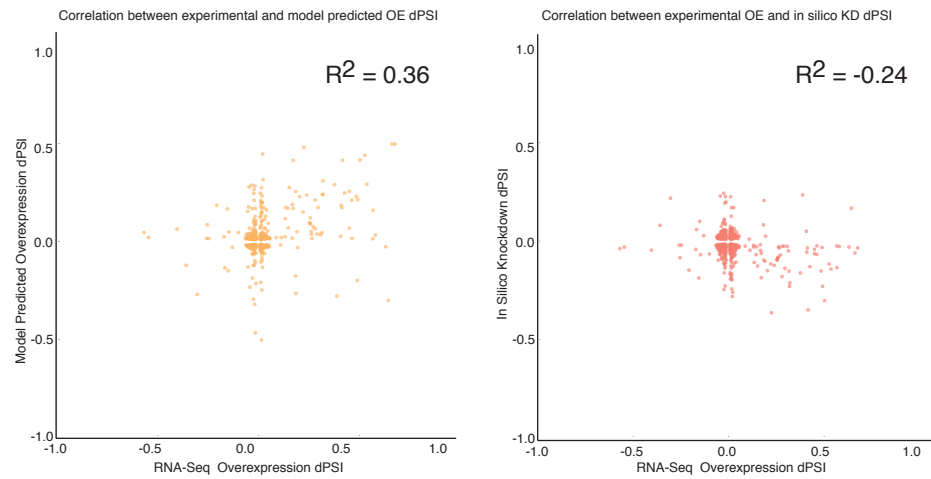

**Mbn1 heart Knockout**

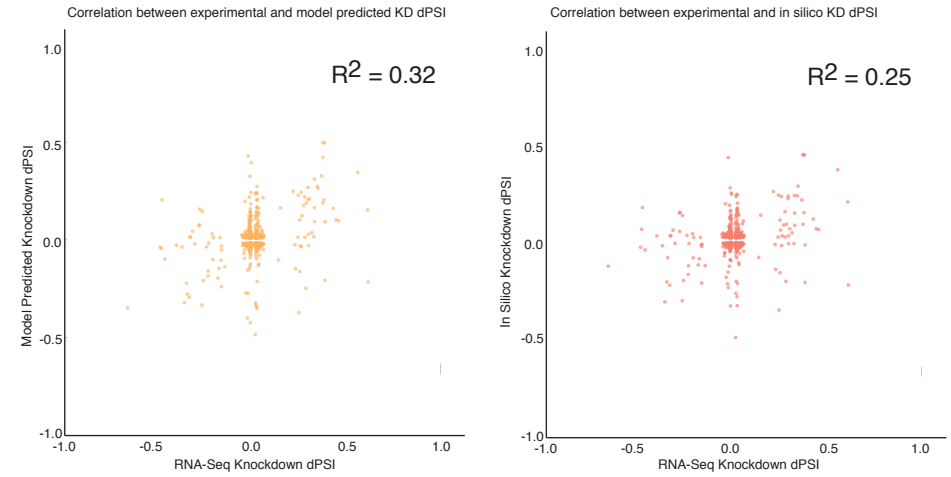

**Celf1 muscle Overexpression**

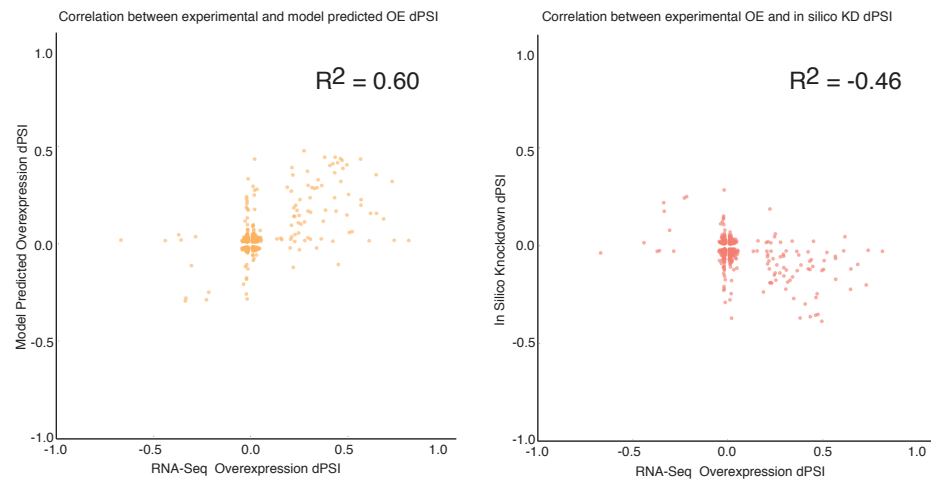

**Mbn1 brain Knockout**

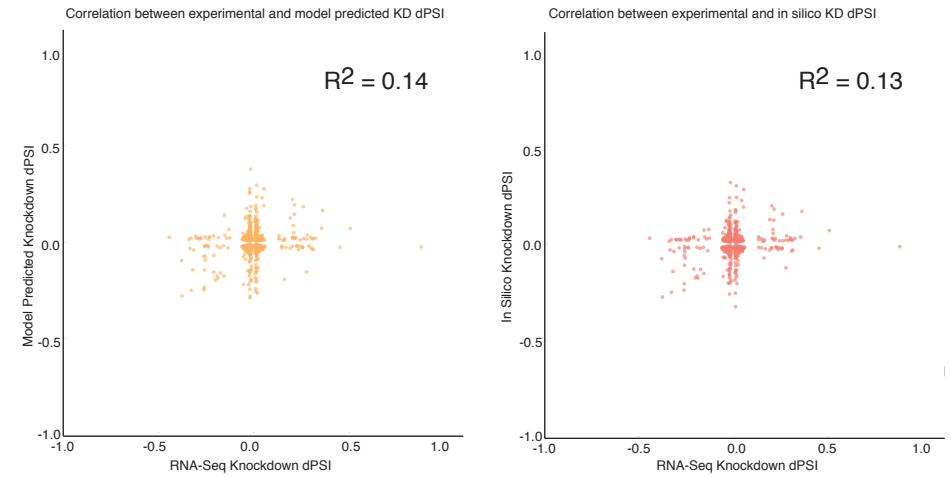

**Supplementary Figure 2: Comparison of Leung et al., 2014 model and our reconstruction**

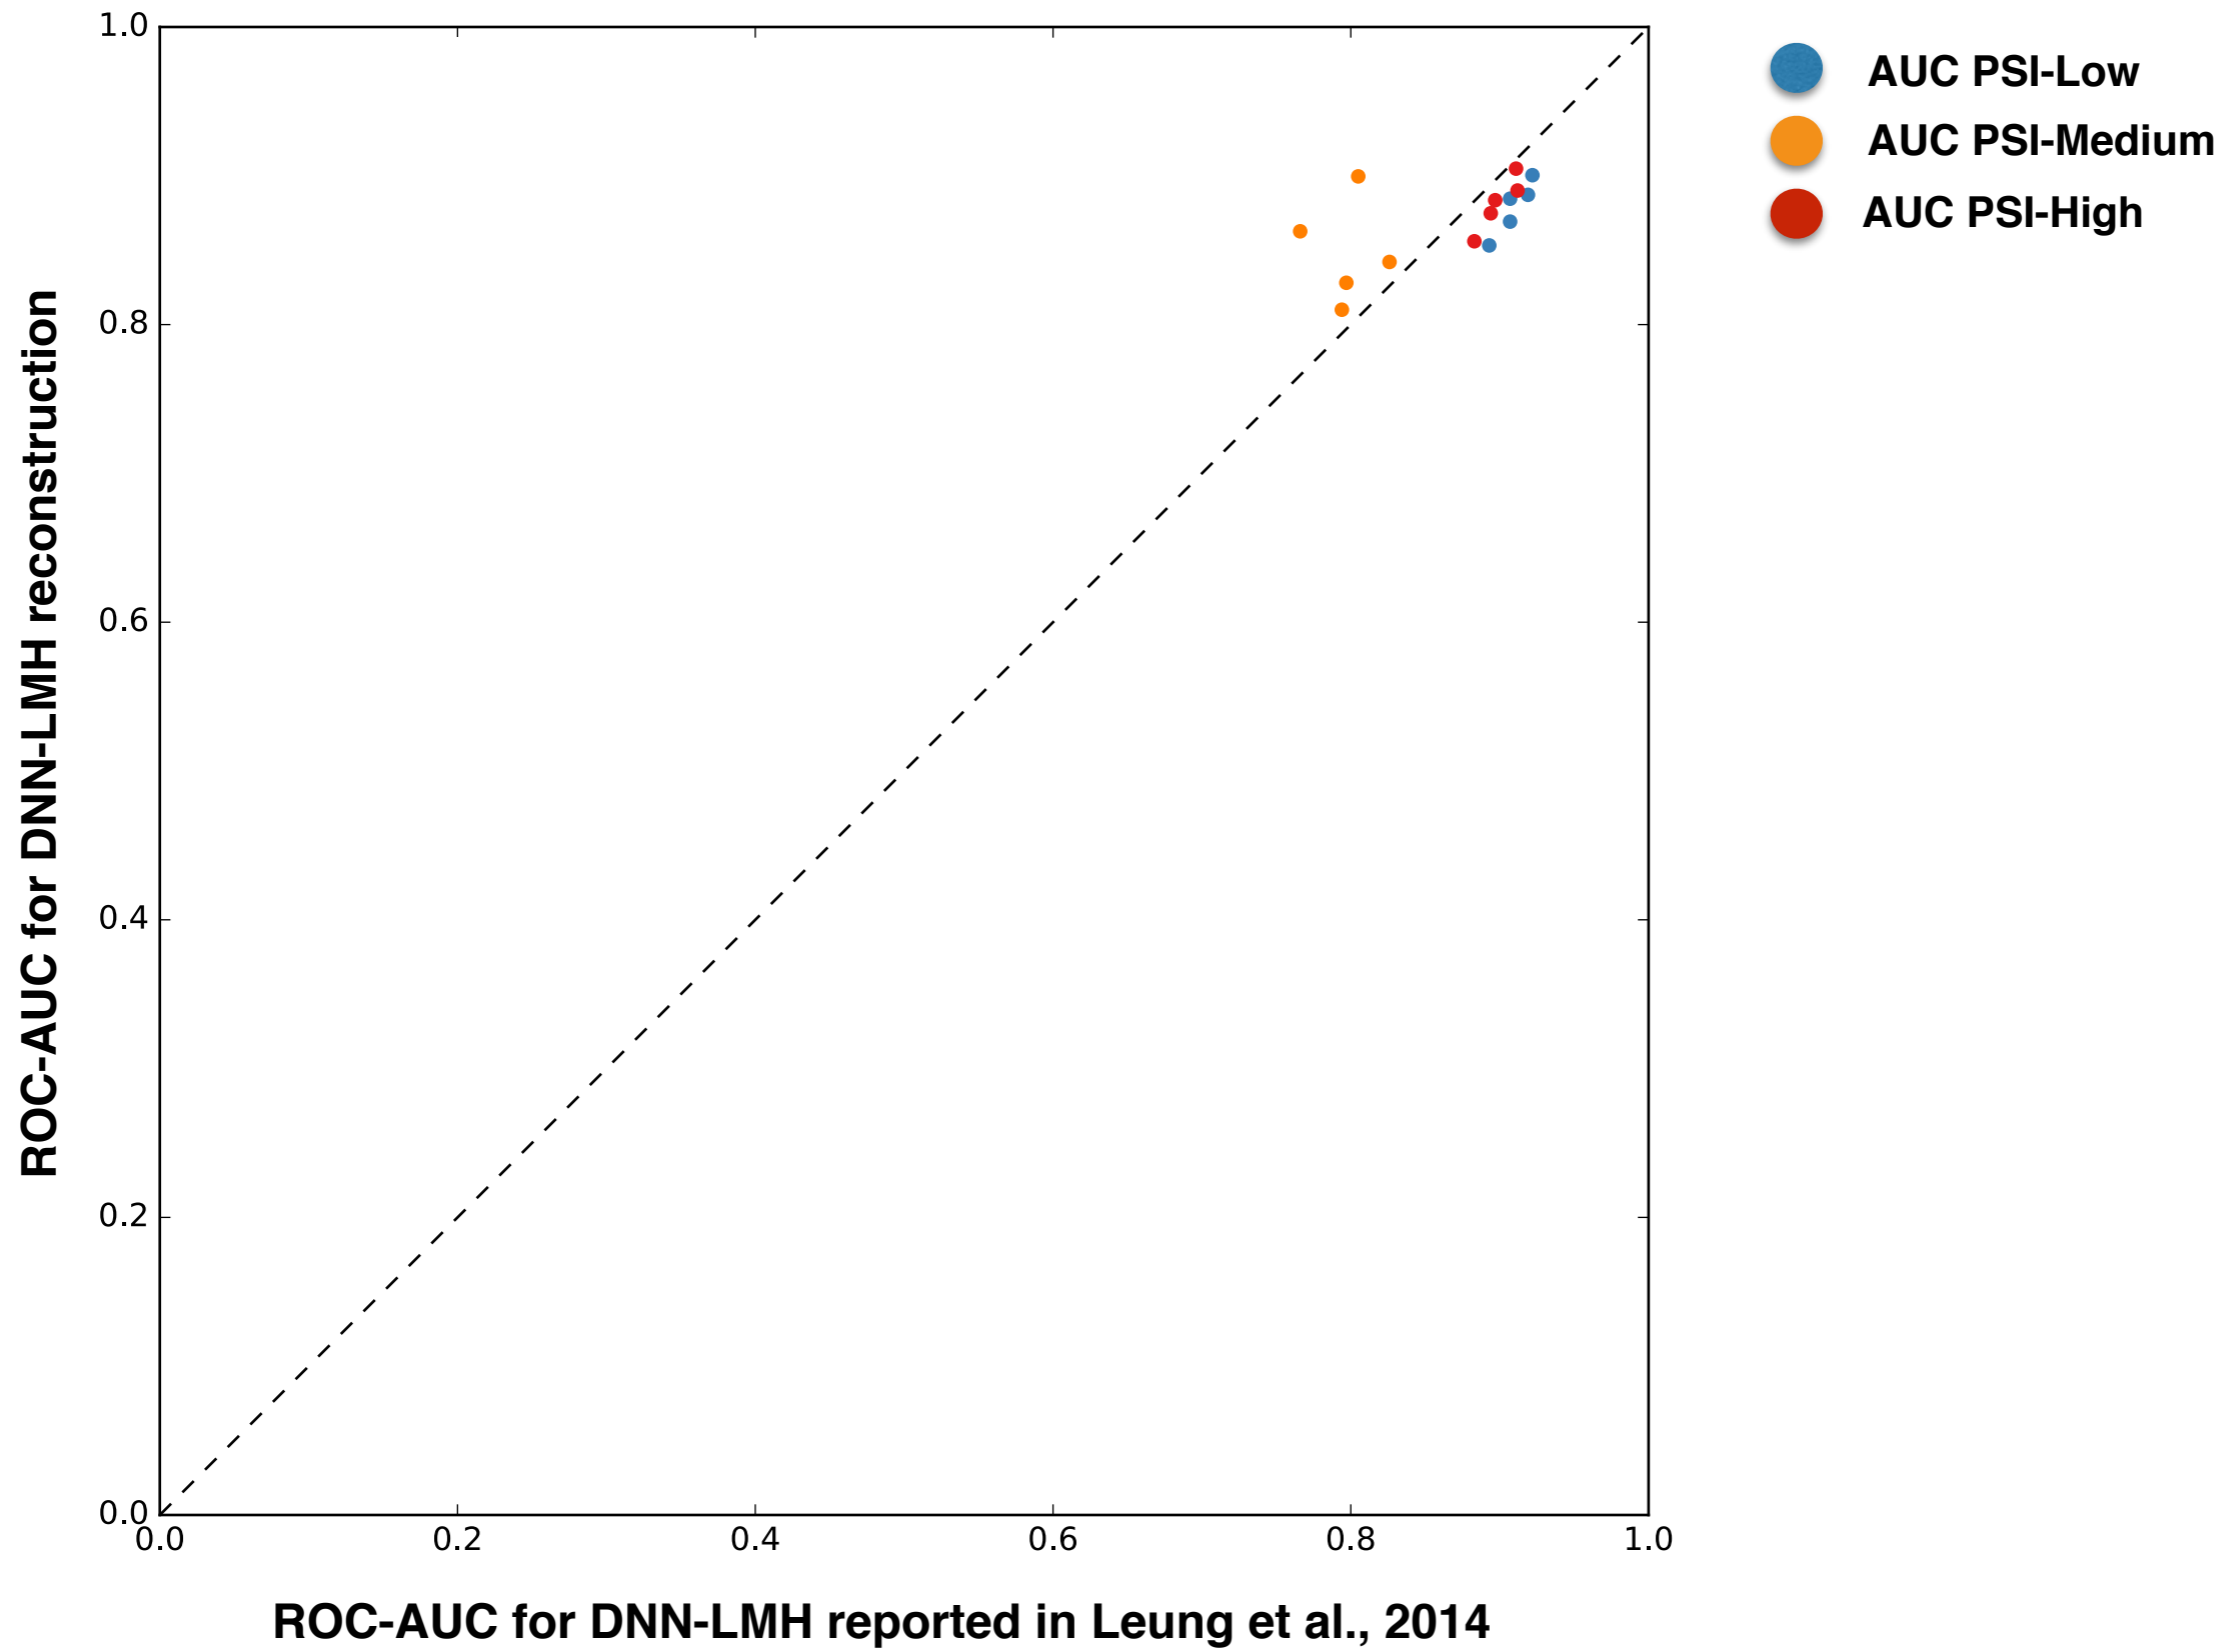

Supplement: btx268_supp.pdf [file btx268_supp.pdf]
